# Supplementary material for: Data-driven selection of conference speakers based on scientific impact to achieve gender parity
Source: PLoS One. 2019 Jul 31;14(7):e0220481. doi: 10.1371/journal.pone.0220481 (PMC6668823; doi:10.1371/journal.pone.0220481)
Supplement: S1 Table — (DOCX) [file pone.0220481.s012.docx]

| Table 1 |
| --- |
| Top 100 **first** authors based on weighted total citation   | **Author** | **Gender** | **Journal** | **Year** | **wTC** | **TC** | **FWCI** | **total publications** | | --- | --- | --- | --- | --- | --- | --- | --- | | Iossifov, Ivan | man | Neuron | 2016 | 465.0 | 465 | 9.5 | 13 | | Giraud, Anne-Lise | woman | Nature Neuroscience | 2016 | 305.0 | 305 | 1.9 | 23 | | Jinek, Martin | man | eLife | 2013 | 127.3 | 509 | 11.7 | 20 | | Schafer, Dorothy P. | woman | Neuron | 2013 | 123.3 | 493 | 8.0 | 11 | | Akerboom, Jasper | man | Journal of Neuroscience | 2014 | 119.0 | 357 | 6.5 | 8 | | Donnelly, Christopher J. | man | Neuron | 2015 | 109.0 | 218 | 7.1 | 12 | | Baliki, Marwan N. | man | Nature Neuroscience | 2015 | 97.5 | 195 | 4.4 | 29 | | Lehmann, Sabrina M. | woman | Nature Neuroscience | 2015 | 97.0 | 194 | 5.2 | 2 | | Butovsky, Oleg | man | Nature Neuroscience | 2014 | 93.3 | 280 | 13.2 | 12 | | Bakker, Arnold | man | Neuron | 2015 | 91.0 | 182 | 3.1 | 69 | | Klengel, Torsten | man | Nature Neuroscience | 2013 | 90.5 | 362 | 5.8 | 36 | | Hickman, Suzanne E. | woman | Nature Neuroscience | 2015 | 89.0 | 178 | 6.3 | 6 | | Watabe-Uchida, Mitsuko | woman | Neuron | 2014 | 88.0 | 264 | 6.6 | 8 | | Kierdorf, Katrin | woman | Nature Neuroscience | 2014 | 81.7 | 245 | 9.3 | 14 | | Montine, Thomas J. | man | Acta Neuropathologica | 2012 | 81.6 | 408 | 14.7 | 131 | | Zhang, Ye; Chen | unkown | Journal of Neuroscience | 2013 | 78.8 | 315 | 0.1 | 5 | | Taylor, Michael D. | man | Acta Neuropathologica | 2012 | 77.8 | 389 | 3.3 | 247 | | Madisen, Linda | woman | Nature Neuroscience | 2013 | 74.3 | 297 | 9.4 | 10 | | Crary, John F. | man | Acta Neuropathologica | 2015 | 70.0 | 140 | 8.2 | 18 | | Hipp, Joerg F. | man | Nature Neuroscience | 2014 | 64.7 | 194 | 2.8 | 14 | | Dulvy, Nicholas K. | man | eLife | 2014 | 64.3 | 193 | 5.9 | 42 | | Usoskin, Dmitry | man | Nature Neuroscience | 2015 | 63.0 | 126 | 13.7 | 29 | | Bazzini, Ariel A. | man | EMBO Journal | 2015 | 63.0 | 126 | 6.1 | 8 | | Settembre, Carmine | man | EMBO Journal | 2012 | 63.0 | 315 | 4.4 | 3 | | Griciuc, Ana | woman | Neuron | 2014 | 62.3 | 187 | 7.5 | 48 | | Dannlowski, Udo | man | Biological Psychiatry | 2013 | 62.3 | 249 | 2.9 | 3 | | Kool, Marcel | man | Acta Neuropathologica | 2013 | 62.0 | 248 | 5.7 | 112 | | Dias, Brian G. | man | Nature Neuroscience | 2013 | 61.0 | 244 | 4.8 | 15 | | Montagne, Axel | man | Neuron | 2015 | 60.0 | 120 | 3.3 | 20 | | Kravitz, Alexxai V. | man | Nature Neuroscience | 2013 | 59.8 | 239 | 3.2 | 21 | | Zamanian, Jennifer L. | woman | Journal of Neuroscience | 2012 | 58.0 | 290 | 17.7 | 2 | | van Zessen, Ruud | man | Neuron | 2014 | 56.7 | 170 | 5.3 | 5 | | Ash, Peter E. A. | man | Neuron | 2012 | 56.2 | 281 | 6.3 | 10 | | Leech, Robert | man | Journal of Neuroscience | 2014 | 55.0 | 165 | 3.3 | 68 | | Scher, Jose U. | man | eLife | 2013 | 54.0 | 216 | 6.7 | 24 | | Miron, Veronique E. | woman | Nature Neuroscience | 2012 | 53.8 | 269 | 5.3 | 8 | | MacLeod, David A. | man | Neuron | 2014 | 53.7 | 161 | 1.4 | 8 | | Yu, Timothy W. | man | Neuron | 2014 | 53.0 | 159 | 6.9 | 4 | | Cajigas, Ivan J. | man | Neuron | 2014 | 53.0 | 159 | 3.0 | 27 | | Grienberger, Christine | woman | Neuron | 2013 | 52.3 | 209 | 2.9 | 9 | | Plavina, Tatiana | woman | Annals of Neurology | 2015 | 52.0 | 104 | 10.7 | 13 | | Bastos, Andre Moraes | man | Neuron | 2015 | 52.0 | 104 | 6.1 | 14 | | Lagier-Tourenne, Clotilde | woman | Nature Neuroscience | 2013 | 51.0 | 204 | 7.0 | 17 | | Sauvageau, Martin | man | eLife | 2013 | 49.8 | 199 | 12.9 | 11 | | Iba, Michiyo | unkown | Journal of Neuroscience | 2014 | 49.0 | 147 | 6.5 | 9 | | Kraemer, Moritz U. G. | man | eLife | 2015 | 48.5 | 97 | 13.0 | 19 | | Brettschneider, Johannes | man | Annals of Neurology | 2014 | 48.0 | 144 | 5.5 | 33 | | Ke, Meng-Tsen | woman | Nature Neuroscience | 2013 | 47.3 | 189 | 5.5 | 3 | | Gapp, Katharina | woman | Nature Neuroscience | 2013 | 47.0 | 188 | 6.0 | 10 | | Knobloch, H. Sophie | woman | Neuron | 2012 | 46.8 | 234 | 7.0 | 15 | | Agarwal, Vikram | man | eLife | 2013 | 46.8 | 187 | 0.8 | 3 | | Freischmidt, Axel | man | Nature Neuroscience | 2015 | 45.5 | 91 | 3.6 | 14 | | Kordasiewicz, Holly B. | woman | Neuron | 2013 | 44.8 | 179 | 4.9 | 9 | | Balbas, Minna D. | woman | eLife | 2014 | 44.7 | 134 | 10.3 | 3 | | Jack, Clifford R., Jr. | man | Annals of Neurology | 2012 | 44.6 | 223 | 3.5 | 289 | | Young, Kaylene M. | woman | Neuron | 2013 | 44.0 | 176 | 1.9 | 17 | | Atallah, Bassam V. | man | Neuron | 2013 | 43.5 | 174 | 4.6 | 6 | | Garg, Abhishek D. | man | EMBO Journal | 2013 | 43.0 | 172 | 5.2 | 50 | | Cole, Michael W. | man | Nature Neuroscience | 2012 | 41.0 | 205 | 5.5 | 18 | | Steentoft, Catharina | woman | EMBO Journal | 2012 | 41.0 | 205 | 4.3 | 28 | | Pigott, David M. | man | eLife | 2014 | 40.0 | 120 | 27.6 | 17 | | Bosman, Conrado A. | man | Neuron | 2012 | 40.0 | 200 | 3.8 | 33 | | Zarate, Carlos A., Jr. | man | Biological Psychiatry | 2012 | 39.0 | 195 | 3.3 | 145 | | Threlfell, Sarah | woman | Neuron | 2012 | 37.4 | 187 | 3.3 | 9 | | Mendell, Jerry R. | man | Annals of Neurology | 2013 | 37.3 | 149 | 3.5 | 62 | | Orenstein, Samantha J. | woman | Nature Neuroscience | 2013 | 37.0 | 148 | 8.3 | 2 | | Wheaton, William W. | man | eLife | 2014 | 36.0 | 108 | 13.8 | 10 | | Guo, Junjie U. | man | Nature Neuroscience | 2013 | 36.0 | 144 | 6.4 | 4 | | Dong-Anh Khuong-Quang | woman | Acta Neuropathologica | 2012 | 35.6 | 178 | 10.0 | 12 | | Zaki, Jamil | man | Nature Neuroscience | 2012 | 35.0 | 175 | 1.8 | 34 | | Noble, Kimberly G. | woman | Nature Neuroscience | 2015 | 34.5 | 69 | 4.7 | 17 | | Kijas, James W. | man | PLoS Biology | 2012 | 34.0 | 170 | 2.6 | 36 | | Tan, Kelly R. | woman | Neuron | 2012 | 32.4 | 162 | 4.2 | 7 | | Faber, Catharina G. | woman | Annals of Neurology | 2012 | 32.2 | 161 | 2.3 | 82 | | Deplus, Rachel | woman | EMBO Journal | 2012 | 32.0 | 160 | 3.8 | 81 | | Mouillot, David | man | PLoS Biology | 2013 | 32.0 | 128 | 3.3 | 10 | | Hughes, Ethan G. | man | Nature Neuroscience | 2013 | 31.5 | 126 | 7.6 | 4 | | McLelland, Gian-Luca | man | EMBO Journal | 2013 | 30.3 | 121 | 9.5 | 7 | | Kessler, Ronald C. | man | Biological Psychiatry | 2012 | 30.2 | 151 | 3.8 | 152 | | Rodgers, Ali B. | unkown | Journal of Neuroscience | 2012 | 29.4 | 147 | 7.3 | 11 | | Ziv, Yaniv | man | Nature Neuroscience | 2012 | 29.4 | 147 | 4.5 | 40 | | Elmore, Monica R. P. | woman | Neuron | 2012 | 29.4 | 147 | 4.4 | 5 | | De Jager, Philip L. | man | Nature Neuroscience | 2013 | 29.0 | 116 | 5.5 | 152 | | Recasens, Ariadna | woman | Annals of Neurology | 2013 | 28.8 | 115 | 6.7 | 5 | | Musiek, Erik S. | man | Nature Neuroscience | 2014 | 27.3 | 82 | 5.8 | 25 | | Erny, Daniel | man | Nature Neuroscience | 2013 | 27.0 | 108 | 7.4 | 8 | | Paz, Jeanne T. | woman | Nature Neuroscience | 2012 | 25.4 | 127 | 7.8 | 8 | | Cole, Michael W. | man | Neuron | 2012 | 24.6 | 123 | 5.5 | 28 | | O'Dushlaine, Colm | man | Nature Neuroscience | 2012 | 20.4 | 102 | 10.3 | 10 | | Sojka, Dorothy K. | woman | eLife | 2012 | 20.4 | 102 | 9.7 | 43 | | Scheres, Sjors H. W. | man | eLife | 2012 | 20.2 | 101 | 9.1 | 39 | | Alami, Nael H. | man | Neuron | 2012 | 19.6 | 98 | 8.0 | 3 | | Deisseroth, Karl | man | Nature Neuroscience | 2013 | 19.3 | 77 | 5.7 | 186 | | Cannon, Tyrone D. | man | Biological Psychiatry | 2013 | 16.5 | 66 | 2.4 | 112 | | Sorge, Robert E. | man | Nature Neuroscience | 2012 | 16.2 | 81 | 4.1 | 20 | | Herrup, Karl | man | Nature Neuroscience | 2012 | 14.0 | 70 | 2.0 | 38 | | Reuss, David E. | man | Acta Neuropathologica | 2012 | 13.8 | 69 | 5.0 | 29 | | Khodagholy, Dion | man | Nature Neuroscience | 2012 | 13.0 | 65 | 5.5 | 18 | | Tasic, Bosiljka | woman | Nature Neuroscience | 2013 | 10.0 | 40 | 8.7 | 9 | | Hamid, Arif A. | man | Nature Neuroscience | 2012 | 6.6 | 33 | 5.6 | 6 | | |

*FWCI: field-weighted citation impact; TC: total citation; wTC; weighted total citation*
